# Supplementary material
Source: PubMed Central journal article supplement (PMC3735678)
Supplement: NIHMS493901-supplement-5.pdf [file NIHMS493901-supplement-5.pdf]

Kant et al. Supplemental figure 4
