# Supplementary material
Source: PubMed Central journal article supplement (PMC3735678)

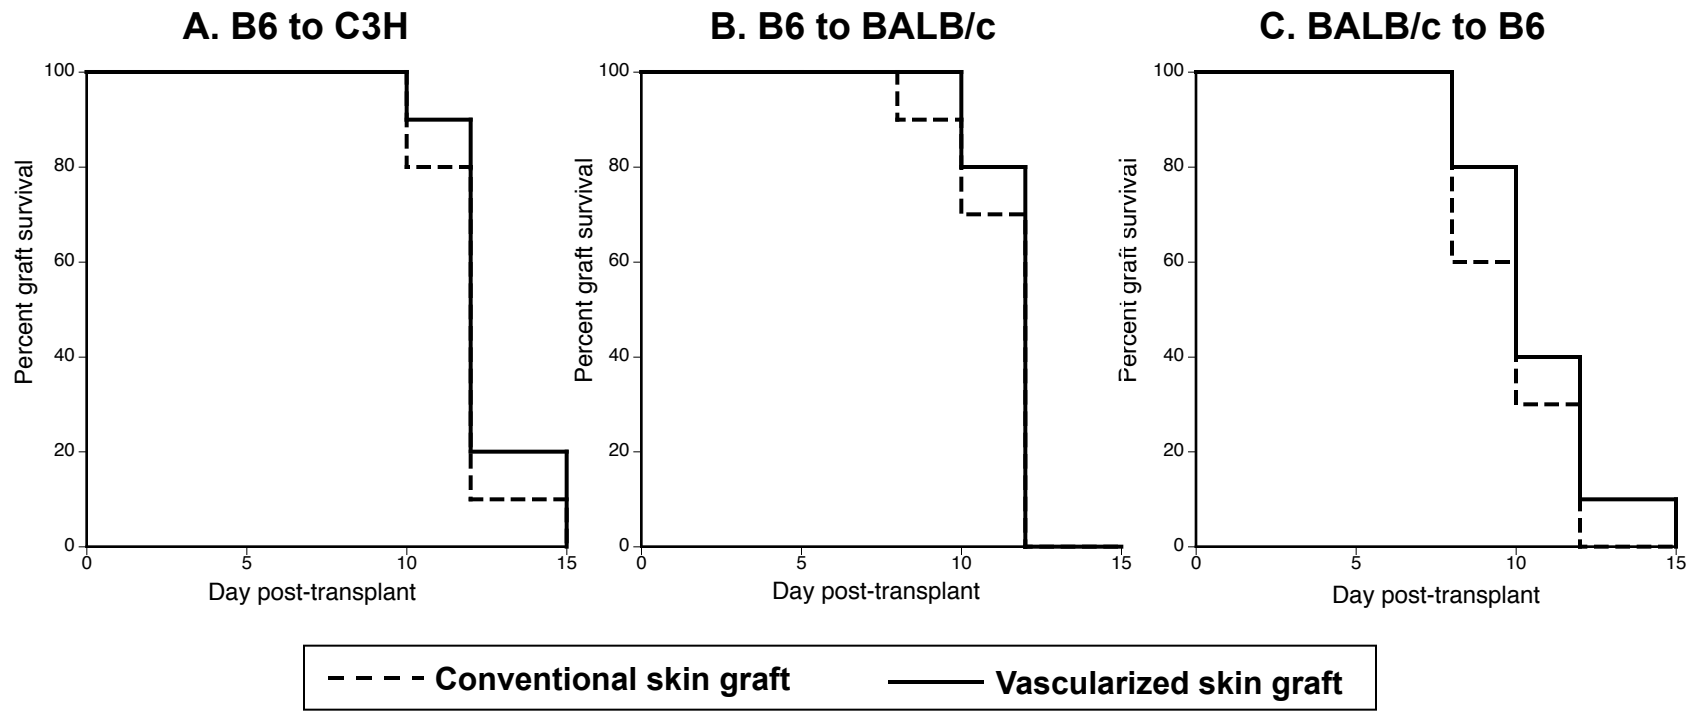

Supplement: NIHMS493901-supplement-2.pdf [file NIHMS493901-supplement-2.pdf]

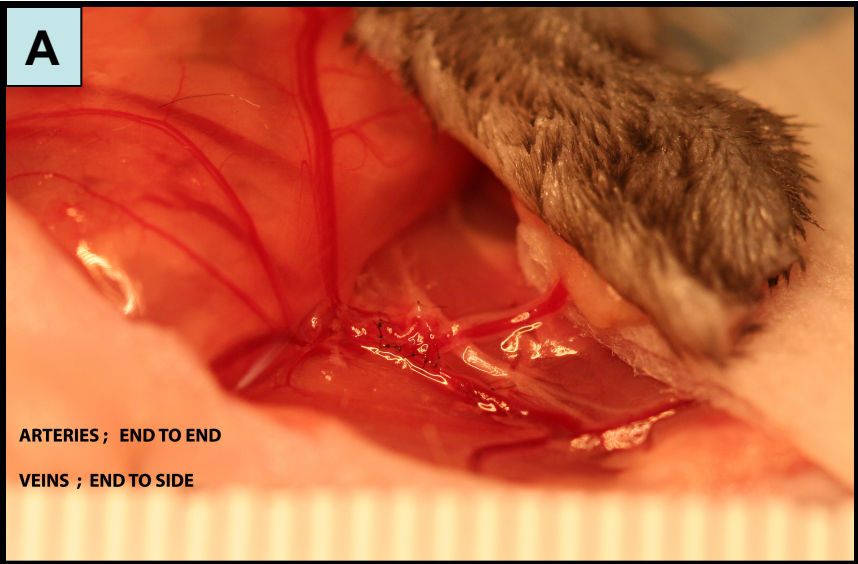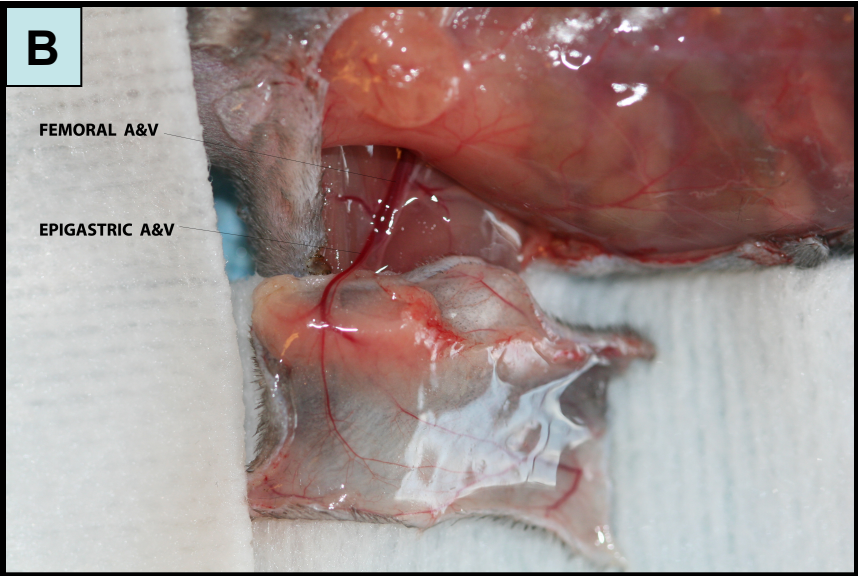

Supplement: NIHMS493901-supplement-3.pdf [file NIHMS493901-supplement-3.pdf]

Kant et al. Supplemental Figure 3

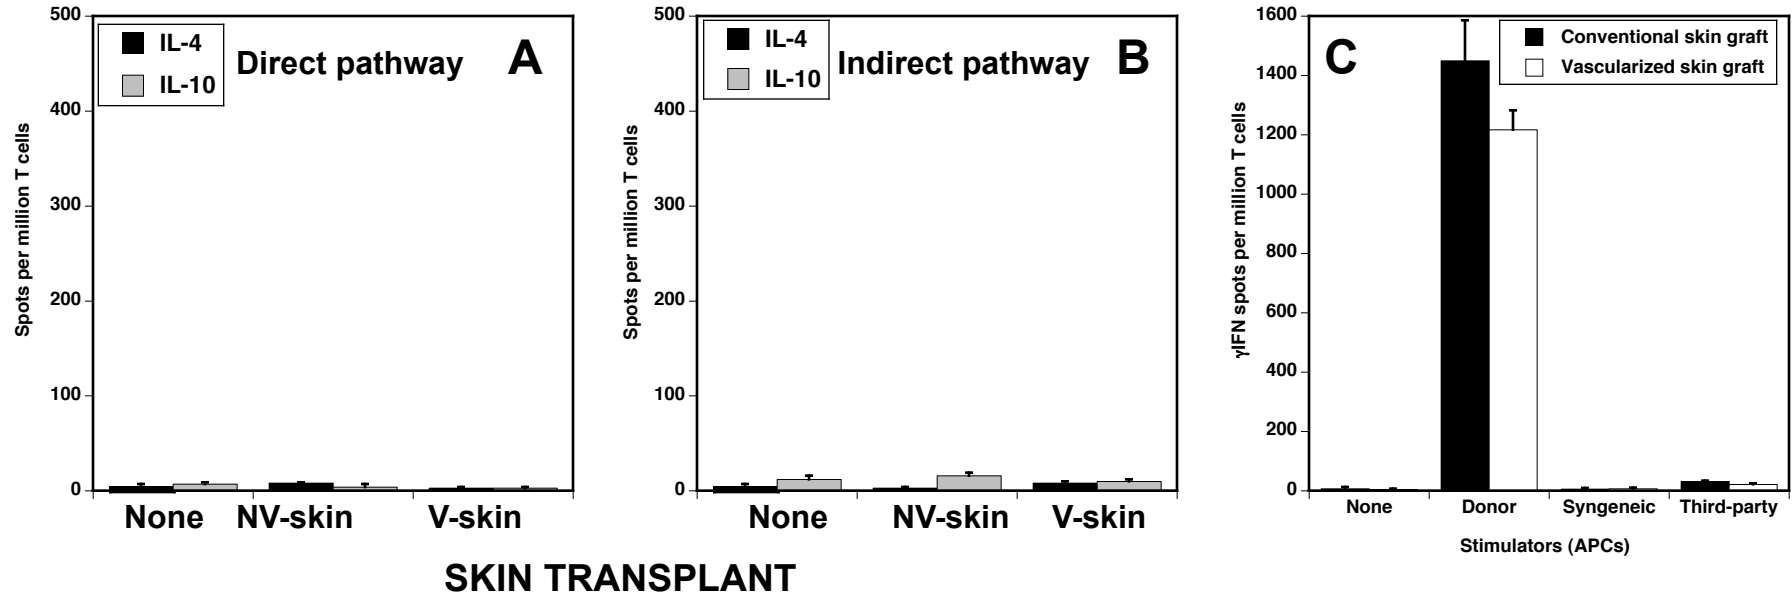

Supplement: NIHMS493901-supplement-4.pdf [file NIHMS493901-supplement-4.pdf]
